# Supplementary material
Source: publisher figshare collection journal article supplement (https://acs.figshare.com/ndownloader/files/3830122)
Supplement: Supplementary file 1 [file 3830122]

 
data_compound_1 
 
_audit_creation_method            SHELXL-97 
_chemical_name_systematic 
; 
 ? 
; 
_chemical_name_common             ? 
_chemical_melting_point           ? 
_chemical_formula_moiety          'C15 H9 N2 O4 S2 Zn, 5(O)'
_chemical_formula_sum 
 'C15 H9 N2 O9 S2 Zn' 
_chemical_formula_weight          490.77 
 
loop_ 
 _atom_type_symbol 
 _atom_type_description 
 _atom_type_scat_dispersion_real 
 _atom_type_scat_dispersion_imag 
 _atom_type_scat_source 
 'C'  'C'   0.0033   0.0016 
 'International Tables Vol C Tables 4.2.6.8 and 6.1.1.4' 
 'H'  'H'   0.0000   0.0000 
 'International Tables Vol C Tables 4.2.6.8 and 6.1.1.4' 
 'N'  'N'   0.0061   0.0033 
 'International Tables Vol C Tables 4.2.6.8 and 6.1.1.4' 
 'O'  'O'   0.0106   0.0060 
 'International Tables Vol C Tables 4.2.6.8 and 6.1.1.4' 
 'S'  'S'   0.1246   0.1234 
 'International Tables Vol C Tables 4.2.6.8 and 6.1.1.4' 
 'Zn'  'Zn'   0.2839   1.4301 
 'International Tables Vol C Tables 4.2.6.8 and 6.1.1.4' 
 
_symmetry_cell_setting            'Triclinic' 
_symmetry_space_group_name_H-M    'P -1' 
 
loop_ 
 _symmetry_equiv_pos_as_xyz 
 'x, y, z' 
 '-x, -y, -z' 
 
_cell_length_a                    9.042(2) 
_cell_length_b                    10.886(3) 
_cell_length_c                    11.504(3) 
_cell_angle_alpha                 92.538(10) 
_cell_angle_beta                  107.026(9) 
_cell_angle_gamma                 104.393(9) 
_cell_volume                      1040.3(5) 
_cell_formula_units_Z             2 
_cell_measurement_temperature     296(2) 
_cell_measurement_reflns_used     7398
_cell_measurement_theta_min       2.45
_cell_measurement_theta_max       33.79 
 
_exptl_crystal_description        block 
_exptl_crystal_colour             white 
_exptl_crystal_size_max           0.47 
_exptl_crystal_size_mid           0.35
_exptl_crystal_size_min           0.26 
_exptl_crystal_density_meas       ? 
_exptl_crystal_density_diffrn     1.567 
_exptl_crystal_density_method     'not measured' 
_exptl_crystal_F_000              494 
_exptl_absorpt_coefficient_mu     1.429 
_exptl_absorpt_correction_type    multi-scan 
_exptl_absorpt_correction_T_min   0.554 
_exptl_absorpt_correction_T_max   0.690
_exptl_absorpt_process_details    multi-scan 
 
_exptl_special_details 
; 
 ? 
; 
 
_diffrn_ambient_temperature       296(2) 
_diffrn_radiation_wavelength      0.71073 
_diffrn_radiation_type            MoK\a 
_diffrn_radiation_source          'fine-focus sealed tube' 
_diffrn_radiation_monochromator   graphite 
_diffrn_measurement_device_type   ? 
_diffrn_measurement_method        ? 
_diffrn_detector_area_resol_mean  ? 
_diffrn_reflns_number             9502 
_diffrn_reflns_av_R_equivalents   0.0072 
_diffrn_reflns_av_sigmaI/netI     0.0076 
_diffrn_reflns_limit_h_min        -11 
_diffrn_reflns_limit_h_max        11 
_diffrn_reflns_limit_k_min        -14 
_diffrn_reflns_limit_k_max        14 
_diffrn_reflns_limit_l_min        -14 
_diffrn_reflns_limit_l_max        14 
_diffrn_reflns_theta_min          1.87 
_diffrn_reflns_theta_max          27.45 
_reflns_number_total              4751 
_reflns_number_gt                 4593 
_reflns_threshold_expression      >2sigma(I) 
 
_computing_data_collection      'Bruker SMART'
_computing_cell_refinement      'Bruker SMART'
_computing_data_reduction       'Bruker SAINT'
_computing_structure_solution   'Bruker SHELXTL'
_computing_structure_refinement 'Bruker SHELXTL'
_computing_molecular_graphics   'Bruker SHELXTL'
_computing_publication_material 'Bruker SHELXTL'
 
_refine_special_details 
; 
 Refinement of F^2^ against ALL reflections.  The weighted R-factor wR and 
 goodness of fit S are based on F^2^, conventional R-factors R are based 
 on F, with F set to zero for negative F^2^. The threshold expression of 
 F^2^ > 2sigma(F^2^) is used only for calculating R-factors(gt) etc. and is 
 not relevant to the choice of reflections for refinement.  R-factors based 
 on F^2^ are statistically about twice as large as those based on F, and R- 
 factors based on ALL data will be even larger. 
; 
 
_refine_ls_structure_factor_coef  Fsqd  
_refine_ls_matrix_type            full 
_refine_ls_weighting_scheme       calc  
_refine_ls_weighting_details 
 'calc w=1/[\s^2^(Fo^2^)+(0.1000P)^2^+0.0000P] where P=(Fo^2^+2Fc^2^)/3' 
_atom_sites_solution_primary      direct 
_atom_sites_solution_secondary    difmap 
_atom_sites_solution_hydrogens    geom 
_refine_ls_hydrogen_treatment     constr 
_refine_ls_extinction_method      none 
_refine_ls_extinction_coef        ? 
_refine_ls_number_reflns          4751 
_refine_ls_number_parameters      262 
_refine_ls_number_restraints      0 
_refine_ls_R_factor_all           0.0342 
_refine_ls_R_factor_gt            0.0328 
_refine_ls_wR_factor_ref          0.1510 
_refine_ls_wR_factor_gt           0.1491 
_refine_ls_goodness_of_fit_ref    1.430 
_refine_ls_restrained_S_all       1.430 
_refine_ls_shift/su_max           0.090 
_refine_ls_shift/su_mean          0.029 
 
loop_ 
 _atom_site_label 
 _atom_site_type_symbol 
 _atom_site_fract_x 
 _atom_site_fract_y 
 _atom_site_fract_z 
 _atom_site_U_iso_or_equiv 
 _atom_site_adp_type 
 _atom_site_occupancy 
 _atom_site_symmetry_multiplicity 
 _atom_site_calc_flag 
 _atom_site_refinement_flags 
 _atom_site_disorder_assembly 
 _atom_site_disorder_group 
Zn1 Zn 0.66362(2) 0.663637(18) 0.110923(17) 0.01505(13) Uani 1 1 d . . . 
S3 S 0.93649(6) 0.18938(4) 0.50169(4) 0.01749(15) Uani 1 1 d . . . 
S4 S 1.09344(5) 0.32394(4) 0.44648(4) 0.01792(15) Uani 1 1 d . . . 
O1 O 0.73030(16) 0.71362(13) -0.03015(13) 0.0183(3) Uani 1 1 d . . . 
O2 O 0.7346(2) 0.65095(16) -0.21580(14) 0.0256(3) Uani 1 1 d . . . 
O3 O 0.43783(16) 0.57072(15) 0.07643(14) 0.0205(3) Uani 1 1 d . . . 
O5 O 0.37798(18) 0.75512(16) 0.09642(18) 0.0305(4) Uani 1 1 d . . . 
N1 N 0.79001(18) 0.55399(15) 0.21224(14) 0.0145(3) Uani 1 1 d . . . 
N3 N 0.74911(18) -0.16784(16) 0.22308(15) 0.0170(3) Uani 1 1 d . . . 
C7 C 0.1643(2) 0.56333(17) 0.03857(16) 0.0148(3) Uani 1 1 d . . . 
C8 C 1.0453(2) 0.52531(18) 0.32620(16) 0.0151(3) Uani 1 1 d . . . 
H8 H 1.1568 0.5561 0.3543 0.018 Uiso 1 1 calc R . . 
C10 C 0.8684(2) 0.05664(17) 0.38719(17) 0.0153(3) Uani 1 1 d . . . 
C15 C 0.1153(2) 0.43351(17) 0.04836(16) 0.0139(3) Uani 1 1 d . . . 
C16 C 0.9518(2) 0.59476(18) 0.25510(16) 0.0154(3) Uani 1 1 d . . . 
H16 H 1.0031 0.6729 0.2362 0.018 Uiso 1 1 calc R . . 
C18 C 0.9680(2) 0.40775(17) 0.35472(17) 0.0150(3) Uani 1 1 d . . . 
C20 C 0.3398(2) 0.63763(19) 0.07447(16) 0.0170(3) Uani 1 1 d . . . 
C22 C 0.7156(2) 0.4402(2) 0.23945(19) 0.0196(4) Uani 1 1 d . . . 
H22 H 0.6039 0.4117 0.2100 0.023 Uiso 1 1 calc R . . 
C26 C 0.7445(2) -0.04448(19) 0.39956(17) 0.0181(4) Uani 1 1 d . . . 
H26 H 0.7002 -0.0376 0.4622 0.022 Uiso 1 1 calc R . . 
C27 C 0.7722(2) 0.64650(18) -0.10303(17) 0.0149(3) Uani 1 1 d . . . 
C30 C 0.0493(2) 0.62912(18) -0.00993(16) 0.0152(3) Uani 1 1 d . . . 
H30 H 0.0830 0.7157 -0.0166 0.018 Uiso 1 1 calc R . . 
C31 C 0.8001(2) 0.3640(2) 0.30993(19) 0.0209(4) Uani 1 1 d . . . 
H31 H 0.7460 0.2858 0.3268 0.025 Uiso 1 1 calc R . . 
C35 C 0.8666(2) -0.07013(19) 0.21082(18) 0.0196(4) Uani 1 1 d . . . 
H35 H 0.9073 -0.0793 0.1464 0.024 Uiso 1 1 calc R . . 
C38 C 0.9298(2) 0.04368(19) 0.29007(18) 0.0196(4) Uani 1 1 d . . . 
H38 H 1.0105 0.1094 0.2789 0.023 Uiso 1 1 calc R . . 
C39 C 0.6899(2) -0.1545(2) 0.31640(18) 0.0191(4) Uani 1 1 d . . . 
H39 H 0.6092 -0.2218 0.3253 0.023 Uiso 1 1 calc R . . 
O9 O 0.7484(3) 0.1218(2) 0.7441(2) 0.0418(4) Uani 1 1 d . . . 
O10 O 0.5839(3) 0.2257(4) 0.5424(3) 0.0722(10) Uani 1 1 d . . . 
O11 O 0.4736(3) 0.5540(4) 0.3911(2) 0.0716(10) Uani 1 1 d . . . 
O16 O 0.3997(5) 0.1471(3) 0.2981(4) 0.0754(9) Uani 1 1 d . . . 
O18 O 0.5279(7) 0.0634(6) 0.0899(7) 0.146(3) Uani 1 1 d . . . 
 
loop_ 
 _atom_site_aniso_label 
 _atom_site_aniso_U_11 
 _atom_site_aniso_U_22 
 _atom_site_aniso_U_33 
 _atom_site_aniso_U_23 
 _atom_site_aniso_U_13 
 _atom_site_aniso_U_12 
Zn1 0.01190(18) 0.01559(19) 0.01716(19) 0.00005(12) 0.00331(12) 0.00472(12) 
S3 0.0219(3) 0.0148(3) 0.0159(3) -0.00009(18) 0.00588(19) 0.00581(19) 
S4 0.0158(3) 0.0155(3) 0.0213(3) 0.00138(18) 0.00283(19) 0.00589(19) 
O1 0.0224(7) 0.0166(6) 0.0208(6) 0.0026(5) 0.0088(5) 0.0112(5) 
O2 0.0312(7) 0.0327(8) 0.0155(7) 0.0048(6) 0.0040(5) 0.0172(6) 
O3 0.0124(6) 0.0232(7) 0.0259(7) 0.0009(6) 0.0056(5) 0.0053(5) 
O5 0.0152(7) 0.0196(7) 0.0516(10) 0.0011(7) 0.0053(6) 0.0026(5) 
N1 0.0130(7) 0.0136(7) 0.0145(7) -0.0024(5) 0.0026(5) 0.0022(5) 
N3 0.0129(7) 0.0176(7) 0.0200(8) -0.0009(6) 0.0054(6) 0.0038(6) 
C7 0.0106(7) 0.0165(8) 0.0160(8) -0.0027(6) 0.0025(6) 0.0043(6) 
C8 0.0111(7) 0.0158(8) 0.0158(8) -0.0015(6) 0.0012(6) 0.0033(6) 
C10 0.0181(8) 0.0136(8) 0.0158(8) 0.0024(6) 0.0051(6) 0.0074(6) 
C15 0.0131(7) 0.0162(8) 0.0133(8) 0.0011(6) 0.0033(6) 0.0067(6) 
C16 0.0146(8) 0.0156(8) 0.0150(8) 0.0008(6) 0.0038(6) 0.0035(6) 
C18 0.0151(8) 0.0131(8) 0.0178(8) 0.0003(6) 0.0048(6) 0.0060(6) 
C20 0.0131(8) 0.0206(9) 0.0159(8) 0.0020(6) 0.0033(6) 0.0037(7) 
C22 0.0123(8) 0.0198(9) 0.0239(10) 0.0030(8) 0.0021(7) 0.0036(7) 
C26 0.0173(8) 0.0193(8) 0.0200(8) -0.0005(7) 0.0101(7) 0.0043(7) 
C27 0.0131(7) 0.0163(8) 0.0162(8) 0.0032(6) 0.0031(6) 0.0073(6) 
C30 0.0146(8) 0.0165(8) 0.0139(7) 0.0001(6) 0.0042(6) 0.0041(7) 
C31 0.0171(9) 0.0179(9) 0.0248(9) 0.0051(7) 0.0037(7) 0.0026(7) 
C35 0.0184(8) 0.0203(9) 0.0199(9) 0.0020(7) 0.0073(7) 0.0035(7) 
C38 0.0223(9) 0.0177(9) 0.0197(9) -0.0009(7) 0.0089(7) 0.0050(7) 
C39 0.0139(8) 0.0205(9) 0.0205(9) -0.0022(7) 0.0054(7) 0.0015(7) 
O9 0.0441(10) 0.0387(10) 0.0485(12) 0.0039(9) 0.0183(9) 0.0177(8) 
O10 0.0389(11) 0.131(3) 0.0639(17) 0.0499(19) 0.0257(11) 0.0353(15) 
O11 0.0448(13) 0.104(2) 0.0362(12) -0.0188(13) 0.0088(10) -0.0223(14) 
O16 0.093(2) 0.0555(16) 0.086(2) 0.0287(15) 0.0237(16) 0.0376(16) 
O18 0.105(3) 0.137(5) 0.249(7) 0.144(5) 0.081(4) 0.074(3) 
 
_geom_special_details 
; 
 All esds (except the esd in the dihedral angle between two l.s. planes) 
 are estimated using the full covariance matrix.  The cell esds are taken 
 into account individually in the estimation of esds in distances, angles 
 and torsion angles; correlations between esds in cell parameters are only 
 used when they are defined by crystal symmetry.  An approximate (isotropic) 
 treatment of cell esds is used for estimating esds involving l.s. planes. 
; 
 
loop_ 
 _geom_bond_atom_site_label_1 
 _geom_bond_atom_site_label_2 
 _geom_bond_distance 
 _geom_bond_site_symmetry_2 
 _geom_bond_publ_flag 
Zn1 O1 1.9445(15) . ? 
Zn1 O3 1.9525(15) . ? 
Zn1 N1 2.0274(17) . ? 
Zn1 N3 2.0320(18) 1_565 ? 
S3 C10 1.7653(19) . ? 
S3 S4 2.0347(7) . ? 
S4 C18 1.7695(19) . ? 
O1 C27 1.284(2) . ? 
O2 C27 1.248(2) . ? 
O3 C20 1.276(3) . ? 
O5 C20 1.233(3) . ? 
N1 C22 1.352(2) . ? 
N1 C16 1.348(2) . ? 
N3 C39 1.350(2) . ? 
N3 C35 1.349(2) . ? 
N3 Zn1 2.0320(18) 1_545 ? 
C7 C15 1.392(3) . ? 
C7 C30 1.404(2) . ? 
C7 C20 1.514(2) . ? 
C8 C16 1.386(3) . ? 
C8 C18 1.400(2) . ? 
C8 H8 0.9300 . ? 
C10 C38 1.401(2) . ? 
C10 C26 1.408(2) . ? 
C15 C30 1.400(2) 2_565 ? 
C15 C27 1.518(2) 2_665 ? 
C16 H16 0.9300 . ? 
C18 C31 1.400(3) . ? 
C22 C31 1.393(3) . ? 
C22 H22 0.9300 . ? 
C26 C39 1.386(3) . ? 
C26 H26 0.9300 . ? 
C27 C15 1.518(2) 2_665 ? 
C30 C15 1.400(2) 2_565 ? 
C30 H30 0.9300 . ? 
C31 H31 0.9300 . ? 
C35 C38 1.391(3) . ? 
C35 H35 0.9300 . ? 
C38 H38 0.9300 . ? 
C39 H39 0.9300 . ? 
 
loop_ 
 _geom_angle_atom_site_label_1 
 _geom_angle_atom_site_label_2 
 _geom_angle_atom_site_label_3 
 _geom_angle 
 _geom_angle_site_symmetry_1 
 _geom_angle_site_symmetry_3 
 _geom_angle_publ_flag 
O1 Zn1 O3 116.14(6) . . ? 
O1 Zn1 N1 114.01(6) . . ? 
O3 Zn1 N1 105.32(7) . . ? 
O1 Zn1 N3 101.22(6) . 1_565 ? 
O3 Zn1 N3 118.11(6) . 1_565 ? 
N1 Zn1 N3 101.43(7) . 1_565 ? 
C10 S3 S4 105.21(6) . . ? 
C18 S4 S3 103.01(7) . . ? 
C27 O1 Zn1 128.23(12) . . ? 
C20 O3 Zn1 116.83(13) . . ? 
C22 N1 C16 118.55(17) . . ? 
C22 N1 Zn1 121.50(12) . . ? 
C16 N1 Zn1 119.95(13) . . ? 
C39 N3 C35 118.47(18) . . ? 
C39 N3 Zn1 118.73(13) . 1_545 ? 
C35 N3 Zn1 122.76(13) . 1_545 ? 
C15 C7 C30 120.00(16) . . ? 
C15 C7 C20 122.42(16) . . ? 
C30 C7 C20 117.55(16) . . ? 
C16 C8 C18 118.53(16) . . ? 
C16 C8 H8 120.7 . . ? 
C18 C8 H8 120.7 . . ? 
C38 C10 C26 118.99(17) . . ? 
C38 C10 S3 125.73(14) . . ? 
C26 C10 S3 115.26(13) . . ? 
C7 C15 C30 118.92(16) . 2_565 ? 
C7 C15 C27 124.76(15) . 2_665 ? 
C30 C15 C27 116.27(16) 2_565 2_665 ? 
N1 C16 C8 122.85(17) . . ? 
N1 C16 H16 118.6 . . ? 
C8 C16 H16 118.6 . . ? 
C31 C18 C8 119.10(17) . . ? 
C31 C18 S4 124.42(15) . . ? 
C8 C18 S4 116.47(13) . . ? 
O5 C20 O3 124.90(17) . . ? 
O5 C20 C7 119.59(17) . . ? 
O3 C20 C7 115.48(17) . . ? 
N1 C22 C31 122.41(17) . . ? 
N1 C22 H22 118.8 . . ? 
C31 C22 H22 118.8 . . ? 
C39 C26 C10 118.60(16) . . ? 
C39 C26 H26 120.7 . . ? 
C10 C26 H26 120.7 . . ? 
O2 C27 O1 123.22(17) . . ? 
O2 C27 C15 118.10(16) . 2_665 ? 
O1 C27 C15 118.46(16) . 2_665 ? 
C7 C30 C15 121.07(17) . 2_565 ? 
C7 C30 H30 119.5 . . ? 
C15 C30 H30 119.5 2_565 . ? 
C22 C31 C18 118.55(18) . . ? 
C22 C31 H31 120.7 . . ? 
C18 C31 H31 120.7 . . ? 
N3 C35 C38 123.02(18) . . ? 
N3 C35 H35 118.5 . . ? 
C38 C35 H35 118.5 . . ? 
C35 C38 C10 118.22(17) . . ? 
C35 C38 H38 120.9 . . ? 
C10 C38 H38 120.9 . . ? 
N3 C39 C26 122.70(17) . . ? 
N3 C39 H39 118.6 . . ? 
C26 C39 H39 118.7 . . ? 
 
loop_ 
 _geom_torsion_atom_site_label_1 
 _geom_torsion_atom_site_label_2 
 _geom_torsion_atom_site_label_3 
 _geom_torsion_atom_site_label_4 
 _geom_torsion 
 _geom_torsion_site_symmetry_1 
 _geom_torsion_site_symmetry_2 
 _geom_torsion_site_symmetry_3 
 _geom_torsion_site_symmetry_4 
 _geom_torsion_publ_flag 
C10 S3 S4 C18 89.13(9) . . . . ? 
O3 Zn1 O1 C27 -83.53(16) . . . . ? 
N1 Zn1 O1 C27 39.21(17) . . . . ? 
N3 Zn1 O1 C27 147.24(15) 1_565 . . . ? 
O1 Zn1 O3 C20 -88.90(15) . . . . ? 
N1 Zn1 O3 C20 143.91(14) . . . . ? 
N3 Zn1 O3 C20 31.62(16) 1_565 . . . ? 
O1 Zn1 N1 C22 -126.68(15) . . . . ? 
O3 Zn1 N1 C22 1.79(17) . . . . ? 
N3 Zn1 N1 C22 125.42(15) 1_565 . . . ? 
O1 Zn1 N1 C16 53.99(15) . . . . ? 
O3 Zn1 N1 C16 -177.54(14) . . . . ? 
N3 Zn1 N1 C16 -53.91(15) 1_565 . . . ? 
S4 S3 C10 C38 8.23(19) . . . . ? 
S4 S3 C10 C26 -173.56(13) . . . . ? 
C30 C7 C15 C30 -0.4(3) . . . 2_565 ? 
C20 C7 C15 C30 -178.18(16) . . . 2_565 ? 
C30 C7 C15 C27 -177.84(16) . . . 2_665 ? 
C20 C7 C15 C27 4.4(3) . . . 2_665 ? 
C22 N1 C16 C8 -0.2(3) . . . . ? 
Zn1 N1 C16 C8 179.12(14) . . . . ? 
C18 C8 C16 N1 0.0(3) . . . . ? 
C16 C8 C18 C31 0.5(3) . . . . ? 
C16 C8 C18 S4 -179.64(14) . . . . ? 
S3 S4 C18 C31 -14.60(18) . . . . ? 
S3 S4 C18 C8 165.55(13) . . . . ? 
Zn1 O3 C20 O5 -2.4(3) . . . . ? 
Zn1 O3 C20 C7 175.79(11) . . . . ? 
C15 C7 C20 O5 -160.13(18) . . . . ? 
C30 C7 C20 O5 22.0(3) . . . . ? 
C15 C7 C20 O3 21.6(2) . . . . ? 
C30 C7 C20 O3 -156.30(17) . . . . ? 
C16 N1 C22 C31 0.0(3) . . . . ? 
Zn1 N1 C22 C31 -179.34(16) . . . . ? 
C38 C10 C26 C39 1.3(3) . . . . ? 
S3 C10 C26 C39 -177.03(15) . . . . ? 
Zn1 O1 C27 O2 141.38(16) . . . . ? 
Zn1 O1 C27 C15 -44.1(2) . . . 2_665 ? 
C15 C7 C30 C15 0.4(3) . . . 2_565 ? 
C20 C7 C30 C15 178.30(16) . . . 2_565 ? 
N1 C22 C31 C18 0.5(3) . . . . ? 
C8 C18 C31 C22 -0.7(3) . . . . ? 
S4 C18 C31 C22 179.44(16) . . . . ? 
C39 N3 C35 C38 0.1(3) . . . . ? 
Zn1 N3 C35 C38 -177.55(15) 1_545 . . . ? 
N3 C35 C38 C10 0.3(3) . . . . ? 
C26 C10 C38 C35 -1.0(3) . . . . ? 
S3 C10 C38 C35 177.18(15) . . . . ? 
C35 N3 C39 C26 0.2(3) . . . . ? 
Zn1 N3 C39 C26 178.01(15) 1_545 . . . ? 
C10 C26 C39 N3 -1.0(3) . . . . ? 
 
_diffrn_measured_fraction_theta_max    1.000 
_diffrn_reflns_theta_full              27.45 
_diffrn_measured_fraction_theta_full   1.000 
_refine_diff_density_max    0.807 
_refine_diff_density_min   -1.467 
_refine_diff_density_rms    0.087 
